# Supplementary material for: Phenotypic and Genomic Characterization of Nine String-Positive Carbapenem-Resistant Acinetobacter baumannii Isolates from Israel
Source: PubMed Central journal article supplement (PMC10100839; doi:10.1128/spectrum.03002-22), 2023-01-31
Supplement: spectrum.03002-22-s0001.pdf [file spectrum.03002-22-s0001.pdf]

**Supplementary Table S1:** String length in mm on a different agar plates.

|        | Blood |      | Chocolate |      | MH    |      | Mackonkey |      | MDR   |      |
|--------|-------|------|-----------|------|-------|------|-----------|------|-------|------|
|        | Av    | Std  | Av        | Std  | Av    | Std  | Av        | Std  | Av    | Std  |
| ABF489 | 23.60 | 2.88 | 31.20     | 2.59 | 7.80  | 1.92 | 20.80     | 3.11 | 25.60 | 2.70 |
| AB527  | 24.20 | 2.39 | 8.00      | 2.12 | 10.20 | 1.48 | 22.00     | 1.58 | 10.60 | 1.52 |
| AB4616 | 30.60 | 2.41 | 32.60     | 1.82 | 20.40 | 1.52 | 19.80     | 3.11 | 25.60 | 2.88 |
| AB167  | 11.00 | 2.92 | 9.40      | 1.52 | 8.20  | 1.48 | 13.20     | 2.59 | 5.60  | 1.14 |
| ABD267 | 10.40 | 2.07 | 1.20      | 1.30 | 7.40  | 1.82 | 1.00      | 1.41 | 0.80  | 1.10 |
| AB925  | 10.60 | 1.67 | 7.40      | 1.95 | 9.00  | 2.74 | 10.60     | 2.30 | 21.80 | 2.39 |
| ABF246 | 15.80 | 2.17 | 11.20     | 4.32 | 9.00  | 2.45 | 6.80      | 2.77 | 8.80  | 1.92 |
| AB190  | 15.00 | 4.74 | 13.20     | 3.63 | 9.20  | 3.19 | 8.60      | 2.88 | 11.00 | 2.74 |
| AB378  | 20.60 | 2.88 | 21.40     | 5.86 | 18.00 | 3.61 | 13.40     | 4.16 | 14.20 | 5.40 |

**Supplementary Figure 1. Density gradient assay**

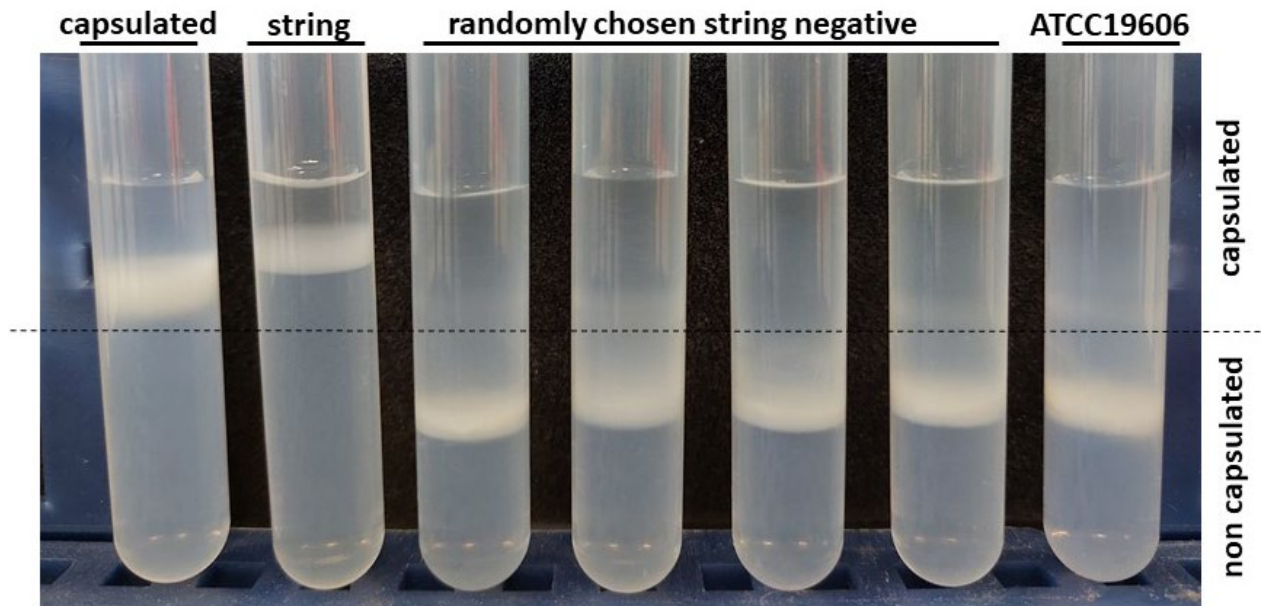

**Supplementary Figure 1. Density gradient assay.** The capsulated strain (Rakovitsky et al, 2021) migrated only to the top phase, as string positive isolates. The control strain ATCC 19606 migrated to the bottom phase, as control clinical non-string isolates, as thinly capsulated bacteria.

**Supplementary Table S2.** Individual motility for stCRAB strains.

|               | <b>Diameter (mm)</b> | <b>SD</b> | <b>SEM</b> |
|---------------|----------------------|-----------|------------|
| <b>AB527</b>  | 12.08                | 2.06      | 0.59       |
| <b>AB378</b>  | 13.92                | 4.25      | 1.22       |
| <b>AB190</b>  | 16.00                | 4.45      | 1.28       |
| <b>ABD267</b> | 22.50                | 6.97      | 2.01       |
| <b>ABF489</b> | 16.17                | 3.61      | 1.04       |
| <b>ABF246</b> | 12.67                | 2.70      | 0.78       |
| <b>AB925</b>  | 15.25                | 4.35      | 1.25       |
| <b>AB167</b>  | 5.75                 | 1.21      | 0.35       |
| <b>AB4616</b> | 5.33                 | 0.77      | 0.22       |
| <b>ATCC</b>   | 5.41                 | 1.08      | 0.31       |

**Supplementary Figure S2.** Phylogenetic tree of nine case string-positive isolates based on pangenomic analysis.

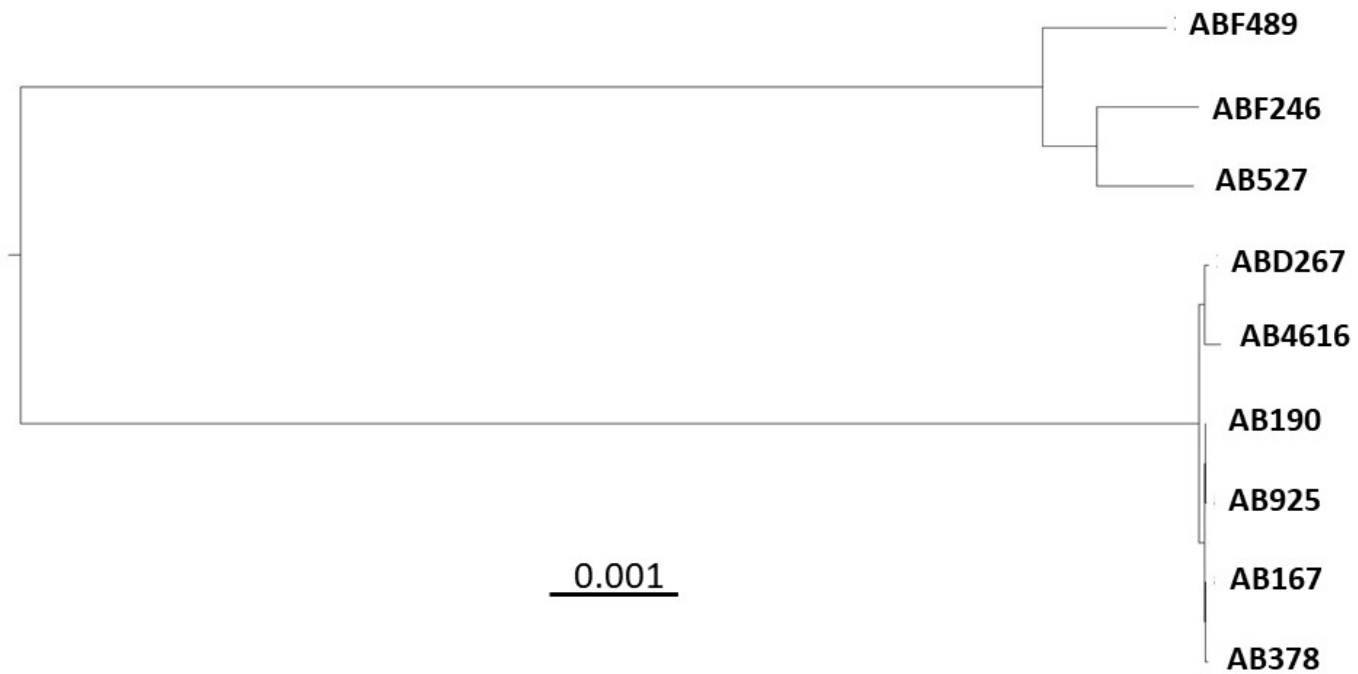

**Supplementary Table S3:** ANI results for pairwise strains analysis (nine string positive strains included)

| AB527 | AB489 | AB246 | ABD267 | AB4616 | AB925 | AB378 | AB190 | AB167 |        |
|-------|-------|-------|--------|--------|-------|-------|-------|-------|--------|
| 97.84 | 99.94 | 97.87 | 99.96  | 99.96  | 99.96 | 99.9  | 99.98 |       | AB167  |
| 97.87 | 99.94 | 97.91 | 99.94  | 99.94  | 99.96 | 99.91 |       | 99.98 | AB190  |
| 98.07 | 99.92 | 98.03 | 99.89  | 99.92  | 99.92 |       | 99.91 | 99.9  | AB378  |
| 97.92 | 99.97 | 97.81 | 99.97  | 99.93  |       | 99.92 | 99.96 | 99.96 | AB925  |
| 97.77 | 99.96 | 97.79 | 99.96  |        | 99.93 | 99.92 | 99.94 | 99.96 | AB4616 |
| 97.84 | 99.94 | 97.87 |        | 99.96  | 99.97 | 99.89 | 99.94 | 99.96 | ABD267 |
| 99.77 | 97.79 |       | 97.87  | 97.79  | 97.81 | 98.03 | 97.91 | 97.87 | AB246  |
| 97.89 |       | 97.79 | 99.94  | 99.96  | 99.97 | 99.92 | 99.94 | 99.94 | AB489  |
|       | 97.89 | 99.77 | 97.84  | 97.77  | 97.92 | 98.07 | 97.87 | 97.84 | AB527  |

**Supplementary Table S4.** SNP distance analysis. A core genome alignment was performed using Roary for three closely related phylogenetic groups; (1) ABF246 and ABF305 (2) ABD258 and AB527 (3) ABE336, ABF155 and ABF489. Each group is comprised of one STRING positive and one or two STRING-negative isolates. SNPs were calculated using SNP-dists 0.8.2 program (<https://github.com/tseemann/snp-dists>)

| <b>Comparison</b> | <b>No. of SNPs</b> |
|-------------------|--------------------|
| ABF246 vs. ABF305 | 152                |
| ABD258 vs. AB527  | 141                |
| ABE336 vs. ABF155 | 389                |
| ABF155 vs. ABF489 | 51                 |
| ABF489 vs. ABE336 | 412                |

**Supplementary Table S5.** Accession number and ST types of genome used as a control in the study

| <u>Accession number</u> | <u>ST type</u> |
|-------------------------|----------------|
| GCA_000214985.2         | ST3            |
| GCA_000241665.2         | ST3            |
| GCA_000278625.1         | ST3            |
| GCA_000278645.1         | ST3            |
| GCA_000286535.1         | ST3            |
| GCA_000305295.1         | ST3            |
| GCA_000309215.1         | ST3            |
| GCA_000368105.1         | ST3            |
| GCA_001612015.1         | ST3            |
| GCA_001612215.1         | ST3            |
| GCA_001950095.1         | ST3            |
| GCA_001950315.1         | ST3            |
| GCA_002150405.1         | ST3            |
| GCA_002183515.1         | ST3            |
| GCA_002416325.1         | ST3            |
| GCA_002416365.1         | ST3            |
| GCA_000367885.1         | ST2            |
| GCA_000189735.2         | ST2            |
| GCA_002416395.1         | ST2            |
| GCA_000513795.2         | ST2            |
| GCA_000188215.1         | ST2            |
| GCA_000509305.1         | ST2            |
| GCA_000509345.1         | ST2            |
| GCA_000359725.1         | ST2            |
| GCA_000299675.1         | ST2            |
| GCA_000417785.2         | ST2            |
| GCA_000302215.1         | ST2            |
| GCA_000307975.2         | ST2            |

|                 |              |     |
|-----------------|--------------|-----|
| GCA_000189655.2 |              | ST2 |
| GCA_000419385.1 |              | ST2 |
| GCA_000804715.1 |              | ST2 |
| GCA_000805615.1 |              | ST2 |
| F223            | SAMN16659894 | ST3 |
| D143            | SAMN16659792 | ST3 |
| E409            | SAMN16659854 | ST3 |
| D291            | SAMN16659814 | ST3 |
| D292            | SAMN16659815 | ST3 |
| F141            | SAMN16659872 | ST3 |
| F155            | SAMN16659882 | ST2 |
| F305            | SAMN16659908 | ST2 |
| E336            | SAMN16659849 | ST2 |
| F136            | SAMN16659869 | ST2 |
| D258            | SAMN16659806 | ST2 |
| D318            | SAMN16659820 | ST2 |



**Supplementary Table S6:** Resistome of the 9 case "string" isolates. + stands for presence of the gene in the genome.

| Antibiotic class                     | Function                                                      | Gene        | ST2   |        |        | ST3   |       |       |       |        |        |
|--------------------------------------|---------------------------------------------------------------|-------------|-------|--------|--------|-------|-------|-------|-------|--------|--------|
|                                      |                                                               |             | AB527 | ABF489 | ABF246 | AB167 | AB190 | AB378 | AB925 | AB4616 | ABD267 |
| Aminoglycosides<br>modifying enzymes | O-nucleotidyltransferases ant (2')-Ia<br>O-phosphotransferase | ant (2')-Ia |       |        |        | +     | +     | +     | +     |        | +      |
|                                      |                                                               | aph(3')-Ia  | +     | +      | +      |       |       |       |       |        |        |
|                                      |                                                               | aph(3')-Via |       | +      | +      | +     | +     |       | +     | +      |        |
|                                      |                                                               | aph(6)-Id   | +     | +      | +      |       |       | +     |       |        |        |
|                                      |                                                               | aph(3'')-Ib | +     | +      | +      |       |       | +     |       |        |        |
| β-Lactams                            | OXA-51-Like β-Lactamase                                       | OXA-71      |       |        |        | +     | +     | +     | +     | +      | +      |
|                                      |                                                               | OXA-66      | +     | +      | +      |       |       |       |       |        |        |
|                                      | Other OXA types β-Lactamase                                   | OXA-23      | +     | +      | +      | +     | +     | +     | +     | +      | +      |
|                                      | AmpC cephalosporinase                                         | AmpC-6      |       |        |        | +     | +     | +     | +     |        |        |
|                                      |                                                               | AmpC-73     | +     | +      | +      |       |       |       |       | +      | +      |
|                                      |                                                               | AmpC-79     |       |        |        |       |       |       | +     | +      |        |
| Sulfonamide                          | Dihydropteroate synthase                                      | Sul1        |       |        |        | +     | +     | +     | +     |        | +      |
|                                      |                                                               | Sul2        |       |        | +      |       |       |       |       |        |        |
| Tetracycline                         | Efflux major facilitator superfamily (MFS) transporter        | Tet(A)      |       |        |        | +     | +     | +     | +     |        | +      |
|                                      |                                                               | Tet(B)      | +     | +      | +      |       |       | +     |       |        |        |
| Macrolide                            | ABC-type ribosomal protection protein                         | msr (E)     | +     | +      | +      |       |       | +     |       |        |        |
|                                      | 2' phosphotransferase                                         | mph (E)     | +     | +      | +      |       |       | +     |       |        |        |
| Antiseptic resistance                | Quaternary ammonium compound-resistance protein               | QacE        |       |        |        | +     | +     | +     | +     |        | +      |

**Supplementary Table S7.** Growth curve parameters for string positive strains in MH.

| <b>strain</b> | <b>lag_time</b> | <b>max_growth</b> | <b>doubling_time</b> | <b>growth_rates</b> |
|---------------|-----------------|-------------------|----------------------|---------------------|
| ATCC          | 15.089          | 1.59              | 6.347                | 0.109               |
| AB527         | 2.227           | 1.185             | 16.652               | 0.042               |
| AB925         | 8.937           | 1.433             | 10.399               | 0.067               |
| AB4616        | 7.923           | 1.089             | 20.069               | 0.035               |
| ABF489        | 3.619           | 1.411             | 13.016               | 0.053               |
| AB167         | 3.157           | 1.292             | 16.994               | 0.041               |
| ABF246        | 3.781           | 1.703             | 8.519                | 0.081               |
| ABD267        | 5.199           | 1.626             | 9.958                | 0.07                |
| AB378         | 9.819           | 1.218             | 16.178               | 0.043               |
| AB190         | 11.933          | 1.73              | 9.127                | 0.076               |
